# Supplementary material
Source: Springer Nature journal article supplement (https://www.springermedizin.de/resource/supplementary/12985_2008_474_MOESM2_ESM.pdf/9607830)

**A.**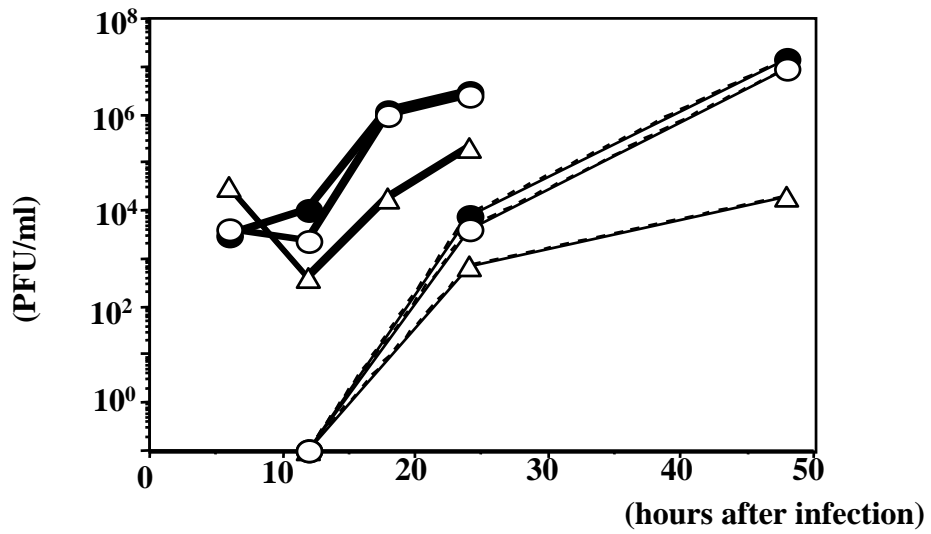**B.**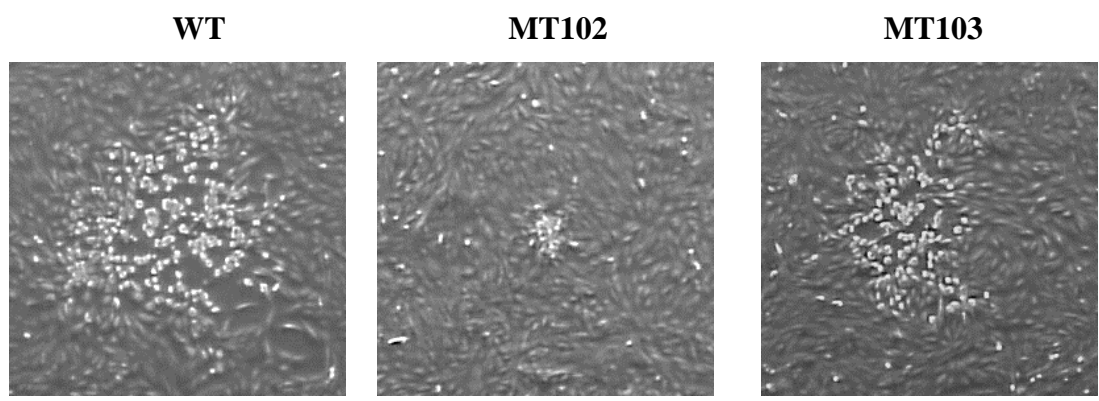**C.**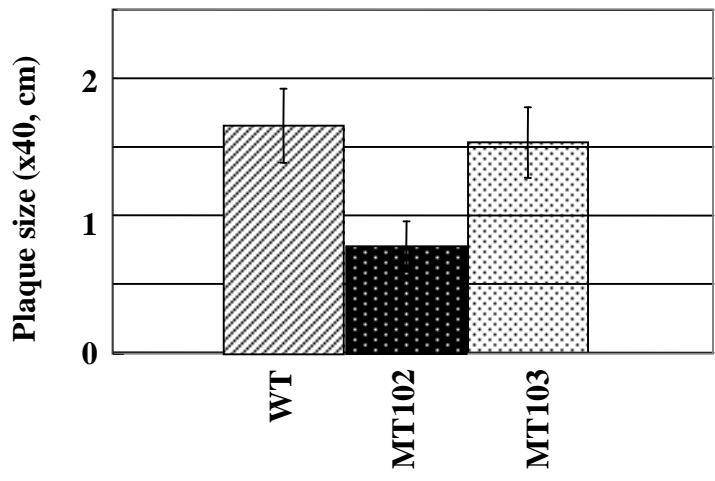

Supplement: MOESM2 [file 9607830]
